# Supplementary material for: Structure and assembly mechanism of a centipede-shaped high-nuclear Dy14Cu12heterometallic nanocluster
Source: Royal Society of Chemistry journal article supplement (doi:10.1039/d2ce01291j), 2022-11-14
Supplement: d2ce01291j1.pdf [file d2ce01291j1.pdf]

## *Supporting Information*

### **Structure and Assembly Mechanism of a Centipede-shaped High-nuclear Dy<sub>14</sub>Cu<sub>12</sub> Heterometallic Nanocluster**

Shui Yu,<sup>ab</sup> Huancheng Hu,<sup>\*a</sup> Zihui Qiu,<sup>\*a</sup> Yuzhen Zhang,<sup>c</sup> Dongcheng Liu,<sup>a</sup> Yuning Liang,<sup>a</sup>  
Hua-Hong Zou,<sup>a</sup> Fu-Pei Liang,<sup>ad</sup> Zilu Chen<sup>\*a</sup>

<sup>a</sup> State Key Laboratory for Chemistry and Molecular Engineering of Medicinal Resources,  
School of Chemistry and Pharmaceutical Sciences, Guangxi Normal University, Guilin  
541004, China. E-mail: [siniantongnian@126.com](mailto:siniantongnian@126.com), [zihuiqiu@aliyun.com](mailto:zihuiqiu@aliyun.com),  
[zlchen@mailbox.gxnu.edu.cn](mailto:zlchen@mailbox.gxnu.edu.cn)

<sup>b</sup> School of Pharmacy, Binzhou Medical University, Yantai 264003, PR China.

<sup>c</sup> School of Chemistry and Chemical Engineering, Guangxi Minzu University, No. 158, Daxue  
West Road, Nanning, Guangxi 530006, China.

<sup>d</sup> Guangxi Key Laboratory of Electrochemical and Magnetochemical Functional Materials,  
College of Chemistry and Bioengineering, Guilin University of Technology, Guilin, 541004, P.  
R. China.

## Table of Contents

|                                                                                              |    |
|----------------------------------------------------------------------------------------------|----|
| 1. Experimental.....                                                                         | 2  |
| 2. Continuous shape measure calculation results for Dy(III) ions.....                        | 5  |
| 3. Crystallographic data, bond distances and angles .....                                    | 8  |
| 4. IR, PXRD and TG figures of <b>1</b> .....                                                 | 12 |
| 5. Additional structural figures of <b>1</b> .....                                           | 13 |
| 6. Major species and fragments detected in <b>1</b> .....                                    | 15 |
| 7. The superposed simulated and observed spectra of several species figure of <b>1</b> ..... | 17 |
| 8. Additional figures for static magnetic properties of <b>1</b> .....                       | 20 |

## 1. Experimental

### Materials and Measurements

All chemical reagents were used as commercially received without further purification. The Fourier transform infrared (FT-IR) data were collected on Perkin-Elmer Spectrum One FT-IR spectrometer using the corresponding KBr Pellets in the wavenumber range of 4000-400  $\text{cm}^{-1}$ . The powder X-ray diffraction (PXRD) measurements were carried out on a Rigaku D/max 2500v/pc diffractometer equipped with Cu- $K\alpha$  radiation ( $\lambda = 1.5418 \text{ \AA}$ ) at 40 kV and 40 mA, with a step size of  $0.02^\circ$  in  $2\theta$  and a scan speed of  $5^\circ \text{ min}^{-1}$ . Elemental analyses for C, H, and N were performed on an Elementar Micro cube C, H, N elemental analyzer. The TG analyses (30-1000  $^\circ\text{C}$ ) for **1** was conducted on a PerkinElmer Diamond TG/DTA thermal analyzer in a flowing nitrogen atmosphere with a heating rate of  $5^\circ \text{C min}^{-1}$ . All magnetic data were measured on a Quantum Design MPMS SQUID-XL-7 SQUID magnetometer furnished with a 7 T magnet. The magnetic data of the two complexes were corrected with a consideration of diamagnetic contribution from the sample and the sample holder.

### Single-crystal X-ray crystallography

Diffraction data for **1** were collected on a Bruker SMART CCD diffractometer (Mo  $K\alpha$  radiation and  $\lambda = 0.71073 \text{ \AA}$ ) in  $\Phi$  and  $\omega$  scan modes. The structures were solved by direct methods, followed by difference Fourier syntheses, and then refined by full-matrix least-squares techniques on  $F^2$  using SHELXL. All other non-hydrogen atoms were refined with anisotropic thermal parameters. Some O atoms have a little large equivalent isotropic displacement parameters probably due to some unresolved disorder. Hydrogen atoms were placed at calculated positions and isotropically refined using a riding model. Some

uncoordinated OH groups from (HL)<sup>3-</sup> ligands, as well as some uncoordinated acetonitrile and water molecules, are modelled as disorder. Table S8 summarizes X-ray crystallographic data and refinement details for the complexes. Full details can be found in the CIF files provided in the Supporting Information. The CCDC reference number is 2223068 for **1**.

### **ESI-MS measurement.**

ESI-MS measurements were conducted at a capillary temperature of 275 °C. Aliquots of the solution were injected into the device at 0.3 mL/h. The mass spectrometer used for the measurements was a Thermo Exactive, and the data were collected in positive and negative ion modes. The spectrometer was previously calibrated with the standard tune mix to give a precision of ca. 2 ppm within the region of 200-2000 m/z. The capillary voltage was 50 V, the tube lens voltage was 150 V, and the skimmer voltage was 25 V. The in-source energy was set within the range of 0-80 eV with a gas flow rate at 10% of the maximum.

The phase purity of cluster **1** was confirmed by PXRD measurements, which exhibited good agreement between experimental patterns and the simulated ones from single crystal X-ray diffraction data, respectively (Figure S2). Good thermal stability of the cluster was confirmed via the thermogravimetric analysis (TGA). For as-synthesized sample of the cluster, TGA curve exhibits a weight loss of 4.75% before 112 °C, which belongs to the loss of five EtOH molecules and six CH<sub>3</sub>CN molecules (calculated 5.32%). With the temperature increasing, the skeleton remains stable in the range of 112 °C – 281°C, and then the structure of **1** start to decompose above 281°C. (Figure S3).

## 2. Continuous shape measure calculation results for Dy(III) ions

**Table S1.** SHAPE analysis of Dy1 in **1**

| Configuration                                            | ABOXIY       |
|----------------------------------------------------------|--------------|
| Enneagon ( $D_{9h}$ )                                    | 32.053       |
| Octagonal pyramid ( $C_{8v}$ )                           | 22.747       |
| Heptagonal bipyramid ( $D_{7h}$ )                        | 20.163       |
| Johnson triangular cupola J3 ( $C_{3v}$ )                | 15.161       |
| Capped cube J8 ( $C_{4v}$ )                              | 8.538        |
| Spherical-relaxed capped cube ( $C_{4v}$ )               | 8.699        |
| <b>Capped square antiprism J10 (<math>C_{4v}</math>)</b> | <b>0.858</b> |
| Spherical capped square antiprism ( $C_{4v}$ )           | 1.169        |
| Tricapped trigonal prism J51 ( $D_{3h}$ )                | 1.454        |
| Spherical tricapped trigonal prism ( $D_{3h}$ )          | 1.796        |
| Tridiminished icosahedron J63 ( $C_{3v}$ )               | 12.649       |
| Hula-hoop ( $C_{2v}$ )                                   | 11.836       |
| Muffin ( $C_s$ )                                         | 1.993        |

**Table S2.** SHAPE analysis of Dy2 in **1**

| Configuration                                              | ABOXIY       |
|------------------------------------------------------------|--------------|
| Octagon ( $D_{8h}$ )                                       | 24.993       |
| Heptagonal pyramid ( $C_{7v}$ )                            | 23.210       |
| Hexagonal bipyramid ( $D_{6h}$ )                           | 17.828       |
| Cube ( $O_h$ )                                             | 13.008       |
| Square antiprism ( $D_{4d}$ )                              | 1.682        |
| Triangular dodecahedron ( $D_{2d}$ )                       | 2.418        |
| Johnson gyrobifastigium J26 ( $D_{2d}$ )                   | 14.022       |
| Johnson elongated triangular bipyramid J14<br>( $D_{3H}$ ) | 28.128       |
| Biaugmented trigonal prism J50 ( $C_{2v}$ )                | 1.935        |
| <b>Biaugmented trigonal prism (<math>C_{2v}</math>)</b>    | <b>1.200</b> |
| Snub diphenoid J84 ( $D_{2d}$ )                            | 4.173        |
| Triakis tetrahedron ( $T_d$ )                              | 13.755       |
| Elongated trigonal bipyramid ( $D_{3h}$ )                  | 23.200       |

**Table S3.** SHAPE analysis of Dy<sub>3</sub> in **1**

| Configuration                                           | ABOXIY        |
|---------------------------------------------------------|---------------|
| Octagon ( $D_{8h}$ )                                    | 29.762        |
| Heptagonal pyramid ( $C_{7v}$ )                         | 22.562        |
| Hexagonal bipyramid ( $D_{6h}$ )                        | 13.918        |
| Cube ( $O_h$ )                                          | 7.959         |
| Square antiprism ( $D_{4d}$ )                           | 1.295         |
| <b>Triangular dodecahedron (<math>D_{2d}</math>)</b>    | <b>1.204,</b> |
| Johnson gyrobifastigium J26 ( $D_{2d}$ )                | 14.642        |
| Johnson elongated triangular bipyramid J14 ( $D_{3h}$ ) | 26.793        |
| Biaugmented trigonal prism J50 ( $C_{2v}$ )             | 2.196         |
| Biaugmented trigonal prism ( $C_{2v}$ )                 | 1.883         |
| Snub diphonoid J84 ( $D_{2d}$ )                         | 4.063         |
| Triakis tetrahedron ( $T_d$ )                           | 8.729         |
| Elongated trigonal bipyramid ( $D_{3h}$ )               | 22.005        |

**Table S4.** SHAPE analysis of Dy<sub>4</sub> in **1**

| Configuration                                           | ABOXIY       |
|---------------------------------------------------------|--------------|
| Octagon ( $D_{8h}$ )                                    | 28.965       |
| Heptagonal pyramid ( $C_{7v}$ )                         | 22.673       |
| Hexagonal bipyramid ( $D_{6h}$ )                        | 14.189       |
| Cube ( $O_h$ )                                          | 8.250        |
| <b>Square antiprism (<math>D_{4d}</math>)</b>           | <b>1.058</b> |
| Triangular dodecahedron ( $D_{2d}$ )                    | 1.628        |
| Johnson gyrobifastigium J26 ( $D_{2d}$ )                | 14.588       |
| Johnson elongated triangular bipyramid J14 ( $D_{3h}$ ) | 26.813       |
| Biaugmented trigonal prism J50 ( $C_{2v}$ )             | 2.272        |
| Biaugmented trigonal prism ( $C_{2v}$ )                 | 2.030        |
| Snub diphonoid J84 ( $D_{2d}$ )                         | 4.355        |
| Triakis tetrahedron ( $T_d$ )                           | 9.064        |
| Elongated trigonal bipyramid ( $D_{3h}$ )               | 22.090       |

**Table S5.** SHAPE analysis of Dy5 in **1**

| Configuration                                           | ABOXIY       |
|---------------------------------------------------------|--------------|
| Heptagon ( $D_{7h}$ )                                   | 26.150       |
| Hexagonal pyramid ( $C_{6v}$ )                          | 20.645       |
| Pentagonal bipyramid ( $D_{5h}$ )                       | 7.324        |
| Capped octahedron ( $C_{3v}$ )                          | 3.024        |
| <b>Capped trigonal prism (<math>C_{2v}</math>)</b>      | <b>0.741</b> |
| Johnson pentagonal bipyramid J13 ( $D_{5h}$ )           | 9.914        |
| Johnson elongated triangular pyramid J7<br>( $C_{3v}$ ) | 20.391       |

**Table S6.** SHAPE analysis of Dy6 in **1**

| Configuration                                              | ABOXIY       |
|------------------------------------------------------------|--------------|
| Octagon ( $D_{8h}$ )                                       | 31.681       |
| Heptagonal pyramid ( $C_{7v}$ )                            | 22.025       |
| Hexagonal bipyramid ( $D_{6h}$ )                           | 15.459       |
| Cube ( $O_h$ )                                             | 11.562       |
| Square antiprism ( $D_{4d}$ )                              | 2.777        |
| <b>Triangular dodecahedron (<math>D_{2d}</math>)</b>       | <b>2.012</b> |
| Johnson gyrobifastigium J26 ( $D_{2d}$ )                   | 13.970       |
| Johnson elongated triangular bipyramid J14<br>( $D_{3H}$ ) | 27.879       |
| Biaugmented trigonal prism J50 ( $C_{2v}$ )                | 2.879        |
| Biaugmented trigonal prism ( $C_{2v}$ )                    | 2.300        |
| Snub diphenoid J84 ( $D_{2d}$ )                            | 3.985        |
| Triakis tetrahedron ( $T_d$ )                              | 12.141       |
| Elongated trigonal bipyramid ( $D_{3h}$ )                  | 24.054       |

**Table S7.** SHAPE analysis of Dy7 in **1**

| Configuration                                           | ABOXIY       |
|---------------------------------------------------------|--------------|
| Heptagon ( $D_{7h}$ )                                   | 31.746       |
| Hexagonal pyramid ( $C_{6v}$ )                          | 23.845       |
| <b>Pentagonal bipyramid (<math>D_{5h}</math>)</b>       | <b>0.759</b> |
| Capped octahedron ( $C_{3v}$ )                          | 7.759        |
| Capped trigonal prism ( $C_{2v}$ )                      | 6.218        |
| Johnson pentagonal bipyramid J13 ( $D_{5h}$ )           | 3.509        |
| Johnson elongated triangular pyramid J7<br>( $C_{3v}$ ) | 23.199       |

### 3. Crystallographic data, bond distances and angles

**Table S8.** Crystallographic data of the cluster.

| Cluster                             | <b>1</b>                                                                                |
|-------------------------------------|-----------------------------------------------------------------------------------------|
| Formula                             | $\text{C}_{266}\text{H}_{377}\text{Cu}_{12}\text{Dy}_{14}\text{N}_{30}\text{O}_{119.5}$ |
| fw                                  | 8944.43                                                                                 |
| $T / \text{K}$                      | 103(2)                                                                                  |
| $\lambda / \text{\AA}$              | 1.54184                                                                                 |
| crystal system                      | triclinic                                                                               |
| space group                         | $P\bar{1}$                                                                              |
| $a / \text{\AA}$                    | 18.1682(2)                                                                              |
| $b / \text{\AA}$                    | 21.1150(2)                                                                              |
| $c / \text{\AA}$                    | 23.7150(3)                                                                              |
| $\alpha / ^\circ$                   | 90.1080(10)                                                                             |
| $\beta / ^\circ$                    | 109.6270(10)                                                                            |
| $\gamma / ^\circ$                   | 106.6490(10)                                                                            |
| $V / \text{\AA}^3$                  | 8161.10(17)                                                                             |
| Z                                   | 1                                                                                       |
| $D_c / \text{g}\cdot\text{cm}^{-3}$ | 1.820                                                                                   |
| $\mu / \text{mm}^{-1}$              | 18.369                                                                                  |
| $2\theta / ^\circ$                  | 5.422 to 130.018                                                                        |
| $F(000)$                            | 4411.0                                                                                  |
| reflns collected                    | 126165                                                                                  |
| reflns unique                       | 27220                                                                                   |
| $R_{\text{int}}$                    | 0.0667                                                                                  |
| GOF on $F^2$                        | 1.018                                                                                   |
| $R_1 (I > 2\sigma(I))$              | 0.0555                                                                                  |
| $\omega R_2 (I > 2\sigma(I))$       | 0.1448                                                                                  |
| $R_1$ (all data)                    | 0.0609                                                                                  |
| $\omega R_2$ (all data)             | 0.1500                                                                                  |



**Table S9.** Selected bond lengths / Å and bond angles / ° for **1**.

|              |            |               |            |               |            |
|--------------|------------|---------------|------------|---------------|------------|
| Dy1-O1       | 2.8545 (4) | Dy2-O1        | 2.2797 (3) | Dy3-O12A      | 2.370 (4)  |
| Dy1-O2       | 2.379 (4)  | Dy2-O2        | 2.372 (4)  | Dy3-O14       | 2.281 (4)  |
| Dy1-O3       | 2.351 (4)  | Dy2-O3        | 2.368 (4)  | Dy3-O56       | 2.298 (4)  |
| Dy1-O5       | 2.475 (4)  | Dy2-N2        | 2.502 (5)  | Dy3-O19       | 2.460 (4)  |
| Dy1-O9       | 2.350 (4)  | Dy2-O13       | 2.310 (4)  | Dy3-O20       | 2.408 (4)  |
| Dy1-O11      | 2.345 (4)  | Dy2-O14       | 2.329 (4)  | Dy3-O37       | 2.389 (4)  |
| Dy1-O56A     | 2.386 (4)  | Dy2-O56       | 2.373 (4)  | Dy3-O38       | 2.404 (4)  |
| Dy1-O17A     | 2.367 (4)  | Dy2-O17       | 2.346 (4)  | Dy6-O34       | 2.268 (5)  |
| Dy1-O19A     | 2.462 (4)  | Dy5-O22       | 2.392 (4)  | Dy6-O36       | 2.343 (6)  |
| Dy4-O2       | 2.284 (4)  | Dy5-H22       | 2.5561     | Dy6-O38       | 2.445 (4)  |
| Dy4-O5       | 2.439 (4)  | Dy5-O23       | 2.274 (5)  | Dy6-H38       | 2.2075 (4) |
| Dy4-O6       | 2.421 (4)  | Dy5-N6        | 2.250 (5)  | Dy6-O40       | 2.442 (4)  |
| Dy4-O10      | 2.365 (5)  | Dy5-O32       | 2.354 (4)  | Dy6-O41       | 2.295 (5)  |
| Dy4-O13      | 2.290 (4)  | Dy5-O34       | 2.334 (4)  | Dy6-O45       | 2.261 (5)  |
| Dy4-O22      | 2.358 (5)  | Dy5-O37       | 2.354 (4)  | Dy6-O48       | 2.445 (5)  |
| Dy4-O23      | 2.422 (4)  | Dy5-O38       | 2.334 (4)  | Dy6-O49       | 2.604 (6)  |
| Dy4-O25      | 2.447 (4)  | Cu2-O17       | 1.946 (4)  | Cu3-O23       | 1.984 (4)  |
| Cu1-O3       | 1.933 (4)  | Cu2-O18       | 1.906 (4)  | Cu3-O24       | 1.897 (5)  |
| Cu1-O4       | 1.889 (4)  | Cu2-N3        | 1.920 (6)  | Cu3-N4        | 1.916 (5)  |
| Cu1-N1       | 1.918 (5)  | Cu2-O19       | 1.970 (4)  | Cu3-O25       | 1.990 (4)  |
| Cu1-O5       | 1.966 (4)  | Cu2-O17       | 1.946 (4)  | Cu6-O41       | 1.931 (5)  |
| Cu4-O37      | 1.993 (4)  | Cu5-O27       | 1.939 (5)  | Cu6-O44       | 1.890 (5)  |
| Cu4-O39      | 1.885 (5)  | Cu5-O28       | 1.905 (6)  | Cu6-N8        | 1.920 (6)  |
| Cu4-N7       | 1.930 (5)  | Cu5-N5        | 1.940 (6)  | Cu6-O45       | 1.915 (5)  |
| Cu4-O40      | 1.977 (4)  | Cu5-O29       | 1.918 (5)  | O56A-Dy1-O19A | 69.04(14)  |
| O1-Dy1A      | 2.8545 (4) | O11-Dy1-O56A  | 84.45(14)  | O11-Dy1-O5    | 72.97(15)  |
| O1-Dy2A      | 2.2797 (3) | O9-Dy1-O56A   | 135.70(14) | O9-Dy1-O5     | 76.47(14)  |
| O11-Dy1-O9   | 104.76(15) | O3-Dy1-O56A   | 80.57(14)  | O3-Dy1-O5     | 68.73(14)  |
| O11-Dy1-O3   | 74.97(15)  | O17A-Dy1-O56A | 73.77(14)  | O17A-Dy1-O5   | 138.29(14) |
| O9-Dy1-O3    | 143.72(15) | O2-Dy1-O56A   | 118.69(14) | O2-Dy1-O5     | 67.91(13)  |
| O11-Dy1-O17A | 142.93(15) | O11-Dy1-O19A  | 75.33(15)  | O56A-Dy1-O5   | 145.50(13) |
| O9-Dy1-O17A  | 73.69(15)  | O9-Dy1-O19A   | 71.70(14)  | O19A-Dy1-O5   | 126.75(14) |
| O3-Dy1-O17A  | 128.33(14) | O3-Dy1-O19A   | 139.03(14) | O11-Dy1-O1    | 128.23(11) |
| O11-Dy1-O2   | 136.38(15) | O17A-Dy1-O19A | 69.03(14)  | O9-Dy1-O1     | 127.00(11) |
| O9-Dy1-O2    | 84.37(14)  | O2-Dy1-O19A   | 145.43(13) | O2-Dy2-O56    | 87.46(14)  |
| O3-Dy1-O2    | 73.52(14)  | O3-Dy1-O1     | 64.08(10)  | O1-Dy2-N2     | 137.44(12) |
| O17A-Dy1-O2  | 80.69(14)  | O17A-Dy1-O1   | 64.25(10)  | O13-Dy2-N2    | 68.85(16)  |
| O1-Dy2-O13   | 136.12(11) | O2-Dy1-O1     | 59.06(9)   | O14-Dy2-N2    | 68.28(16)  |
| O1-Dy2-O14   | 136.62(10) | O56A-Dy1-O1   | 59.62(10)  | O17-Dy2-N2    | 78.83(16)  |

|              |            |              |            |              |            |
|--------------|------------|--------------|------------|--------------|------------|
| O13-Dy2-O14  | 80.17(16)  | O19A-Dy1-O1  | 117.31(10) | O3-Dy2-N2    | 79.61(16)  |
| O1-Dy2-O17   | 74.72(10)  | O5-Dy1-O1    | 115.93(10) | O2-Dy2-N2    | 133.73(16) |
| O13-Dy2-O17  | 146.64(15) | O1-Dy2-O2    | 68.31(9)   | O56-Dy2-N2   | 133.57(16) |
| O14-Dy2-O17  | 80.44(15)  | O13-Dy2-O2   | 70.32(14)  | O14-Dy3-O56  | 72.52(14)  |
| O1-Dy2-O3    | 73.89(10)  | O14-Dy2-O2   | 124.18(14) | O14-Dy3-O12A | 150.68(15) |
| O13-Dy2-O3   | 80.96(15)  | O17-Dy2-O2   | 142.66(14) | O56-Dy3-O12A | 84.17(14)  |
| O14-Dy2-O3   | 146.90(14) | O3-Dy2-O2    | 73.34(14)  | O14-Dy3-O37  | 116.85(15) |
| O17-Dy2-O3   | 101.62(14) | O1-Dy2-O56   | 69.03(10)  | O56-Dy3-O37  | 76.67(14)  |
| O14-Dy3-O20  | 84.31(15)  | O13-Dy2-O56  | 123.05(15) | O12A-Dy3-O37 | 73.00(15)  |
| O56-Dy3-O20  | 138.25(15) | O14-Dy2-O56  | 70.34(14)  | O14-Dy3-O38  | 76.21(15)  |
| O12A-Dy3-O20 | 102.72(16) | O17-Dy2-O56  | 74.42(14)  | O56-Dy3-O38  | 113.34(15) |
| O37-Dy3-O20  | 144.95(15) | O3-Dy2-O56   | 142.44(14) | O12A-Dy3-O38 | 130.73(14) |
| O38-Dy3-O20  | 93.31(15)  | O20-Dy3-O40  | 75.52(15)  | O37-Dy3-O38  | 67.73(14)  |
| O14-Dy3-O40  | 136.18(14) | O14-Dy3-O19  | 80.43(15)  | O2-Dy4-O13   | 72.24(14)  |
| O56-Dy3-O40  | 143.62(14) | O56-Dy3-O19  | 70.47(14)  | O2-Dy4-O22   | 115.04(15) |
| O12A-Dy3-O40 | 72.70(14)  | O12A-Dy3-O19 | 75.07(14)  | O13-Dy4-O22  | 76.63(16)  |
| O37-Dy3-O40  | 69.98(14)  | O37-Dy3-O19  | 135.86(14) | O2-Dy4-O10   | 82.98(15)  |
| O38-Dy3-O40  | 66.79(14)  | O38-Dy3-O19  | 153.43(14) | O13-Dy4-O10  | 150.66(15) |
| O2-Dy4-O23   | 75.18(14)  | O20-Dy3-O19  | 71.78(15)  | O22-Dy4-O10  | 129.54(15) |
| O13-Dy4-O23  | 113.27(15) | O40-Dy3-O19  | 126.83(14) | O2-Dy4-O6    | 138.01(15) |
| O22-Dy4-O23  | 67.27(15)  | O23-Dy4-O5   | 136.61(14) | O13-Dy4-O6   | 83.07(15)  |
| O10-Dy4-O23  | 73.73(15)  | O2-Dy4-O25   | 141.16(14) | O22-Dy4-O6   | 90.52(16)  |
| O6-Dy4-O23   | 146.76(14) | O13-Dy4-O25  | 138.29(15) | O10-Dy4-O6   | 106.66(16) |
| O2-Dy4-O5    | 69.99(14)  | O22-Dy4-O25  | 66.56(15)  | O34-Dy5-O32  | 86.82(19)  |
| O13-Dy4-O5   | 79.86(15)  | O10-Dy4-O25  | 71.00(15)  | O34-Dy5-O23  | 152.17(16) |
| O22-Dy4-O5   | 152.54(15) | O6-Dy4-O25   | 78.47(15)  | O32-Dy5-O23  | 79.47(18)  |
| O10-Dy4-O5   | 77.03(14)  | O23-Dy4-O25  | 70.22(14)  | O34-Dy5-O38  | 75.53(16)  |
| O6-Dy4-O5    | 72.63(15)  | O5-Dy4-O25   | 127.89(14) | O32-Dy5-O38  | 135.12(18) |
| O45-Dy6-O34  | 84.00(18)  | O34-Dy5-N6   | 69.40(18)  | O23-Dy5-O38  | 130.51(14) |
| O45-Dy6-O41  | 68.78(17)  | O32-Dy5-N6   | 68.29(19)  | O34-Dy5-O37  | 81.14(17)  |
| O34-Dy6-O41  | 94.59(18)  | O23-Dy5-N6   | 83.00(16)  | O32-Dy5-O37  | 148.39(17) |
| O45-Dy6-O36  | 79.13(19)  | O38-Dy5-N6   | 136.42(17) | O23-Dy5-O37  | 98.07(14)  |
| O34-Dy6-O36  | 98.9(2)    | O37-Dy5-N6   | 80.11(17)  | O38-Dy5-O37  | 69.48(15)  |
| O41-Dy6-O36  | 143.57(19) | O22-Dy5-N6   | 137.47(17) | O34-Dy5-O22  | 131.55(17) |
| O45-Dy6-O40  | 141.71(17) | O45-Dy6-O38  | 142.44(16) | O32-Dy5-O22  | 75.91(17)  |
| O34-Dy6-O40  | 84.49(16)  | O34-Dy6-O38  | 73.01(15)  | O23-Dy5-O22  | 68.24(15)  |
| O41-Dy6-O40  | 75.93(15)  | O41-Dy6-O38  | 140.75(15) | O38-Dy5-O22  | 85.54(15)  |
| O36-Dy6-O40  | 138.82(17) | O36-Dy6-O38  | 75.68(18)  | O50-Dy7-O29  | 101.4(4)   |
| O45-Dy6-O48  | 127.67(18) | O40-Dy6-O38  | 66.07(14)  | O50-Dy7-O32  | 167.9(4)   |
| O34-Dy6-O48  | 147.41(16) | O48-Dy6-O38  | 75.83(15)  | O29-Dy7-O32  | 90.07(19)  |
| O41-Dy6-O48  | 103.64(18) | O45-Dy6-O49  | 77.75(19)  | O50-Dy7-O35  | 101.5(3)   |
| O36-Dy6-O48  | 82.31(19)  | O34-Dy6-O49  | 161.48(18) | O29-Dy7-O35  | 78.7(2)    |
| O40-Dy6-O48  | 74.31(15)  | O41-Dy6-O49  | 76.0(2)    | O32-Dy7-O35  | 76.8(2)    |

|             |            |             |            |             |            |
|-------------|------------|-------------|------------|-------------|------------|
| O35-Dy7-O27 | 145.1(2)   | O36-Dy6-O49 | 80.9(2)    | O50-Dy7-O27 | 97.1(3)    |
| O50-Dy7-O25 | 89.2(3)    | O40-Dy6-O49 | 108.04(18) | O29-Dy7-O27 | 68.73(18)  |
| O29-Dy7-O25 | 144.83(18) | O48-Dy6-O49 | 51.09(17)  | O32-Dy7-O27 | 90.68(19)  |
| O32-Dy7-O25 | 83.44(18)  | O38-Dy6-O49 | 124.17(17) | O50-Dy7-O29 | 101.4(4)   |
| O35-Dy7-O25 | 132.26(19) | O35-Dy7-O22 | 66.75(19)  | O29-Dy7-O22 | 144.65(17) |
| O27-Dy7-O25 | 76.79(16)  | O27-Dy7-O22 | 141.62(17) | O32-Dy7-O22 | 75.33(16)  |
| O50-Dy7-O22 | 92.9(4)    | O25-Dy7-O22 | 66.34(15)  | O24-Cu3-O23 | 92.24(19)  |
| O4-Cu1-N1   | 93.3(2)    | O18-Cu2-N3  | 92.1(2)    | N4-Cu3-O23  | 170.2(2)   |
| O4-Cu1-O3   | 92.32(18)  | O18-Cu2-O17 | 93.88(19)  | O24-Cu3-O25 | 174.5(2)   |
| N1-Cu1-O3   | 171.7(2)   | N3-Cu2-O17  | 173.4(2)   | N4-Cu3-O25  | 85.2(2)    |
| O4-Cu1-O5   | 175.1(2)   | O18-Cu2-O19 | 176.0(2)   | O23-Cu3-O25 | 89.62(18)  |
| N1-Cu1-O5   | 86.3(2)    | N3-Cu2-O19  | 85.4(2)    | O44-Cu6-O45 | 175.9(2)   |
| O3-Cu1-O5   | 88.70(18)  | O17-Cu2-O19 | 88.71(17)  | O44-Cu6-N8  | 93.7(2)    |
| O39-Cu4-N7  | 93.6(2)    | O28-Cu5-O29 | 172.4(3)   | O45-Cu6-N8  | 85.8(2)    |
| O39-Cu4-O40 | 174.7(2)   | O28-Cu5-O27 | 99.2(2)    | O44-Cu6-O41 | 96.9(2)    |
| N7-Cu4-O40  | 84.8(2)    | O29-Cu5-O27 | 83.9(2)    | O45-Cu6-O41 | 84.0(2)    |
| O39-Cu4-O37 | 93.71(19)  | O28-Cu5-N5  | 92.5(2)    | N8-Cu6-O41  | 168.4(2)   |
| N7-Cu4-O37  | 170.7(2)   | O29-Cu5-N5  | 85.0(2)    | O27-Cu5-N5  | 167.4(2)   |
| O40-Cu4-O37 | 88.38(18)  |             |            |             |            |

Symmetry code: (A)  $-x+1, -y+2, -z+1$ .

#### 4. IR, PXRD and TG figures of 1

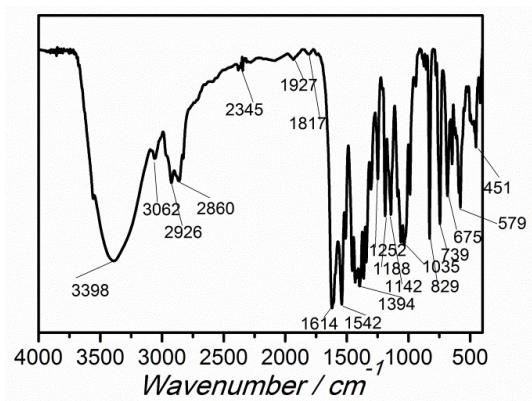

Figure S1. FT-IR spectrum of 1.

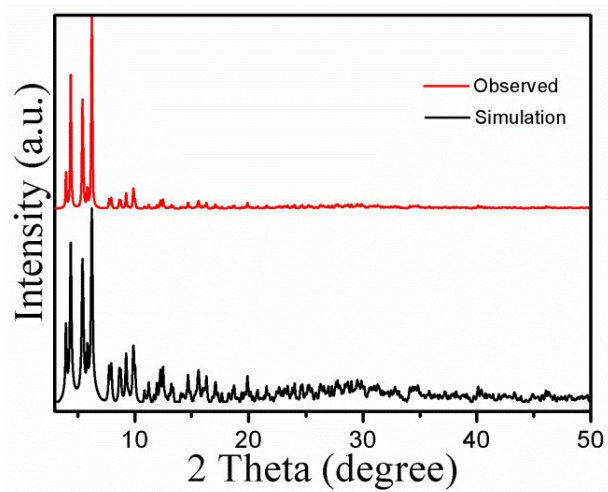

Figure S2. PXRD patterns of 1.

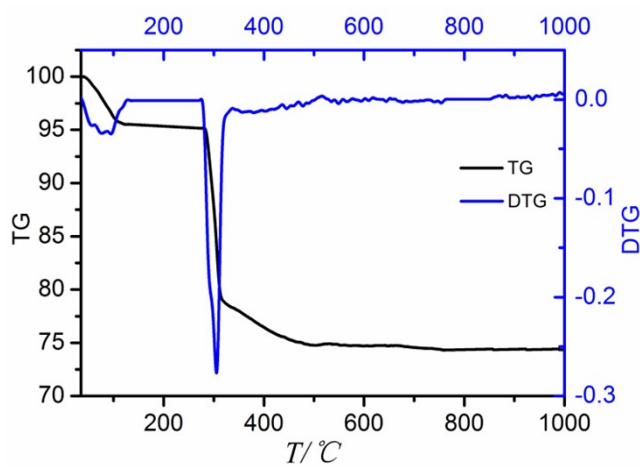

Figure S3. TG patterns of 1.

5. Additional structural figures of 1

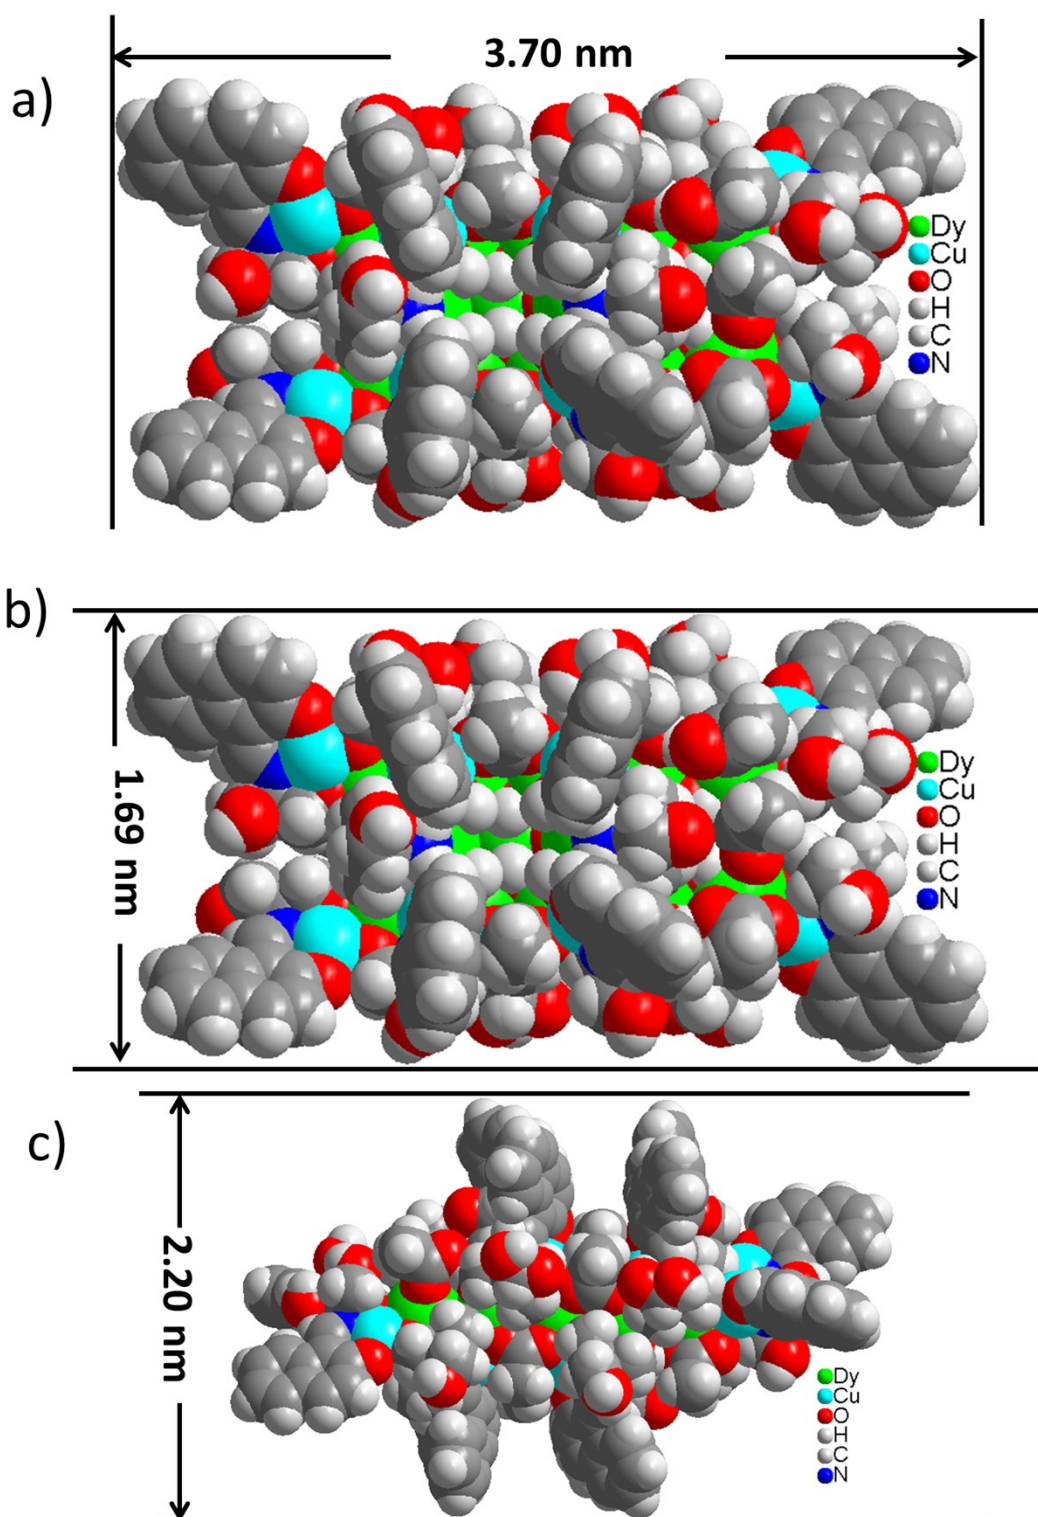

Figure S4. The size of cluster 1.

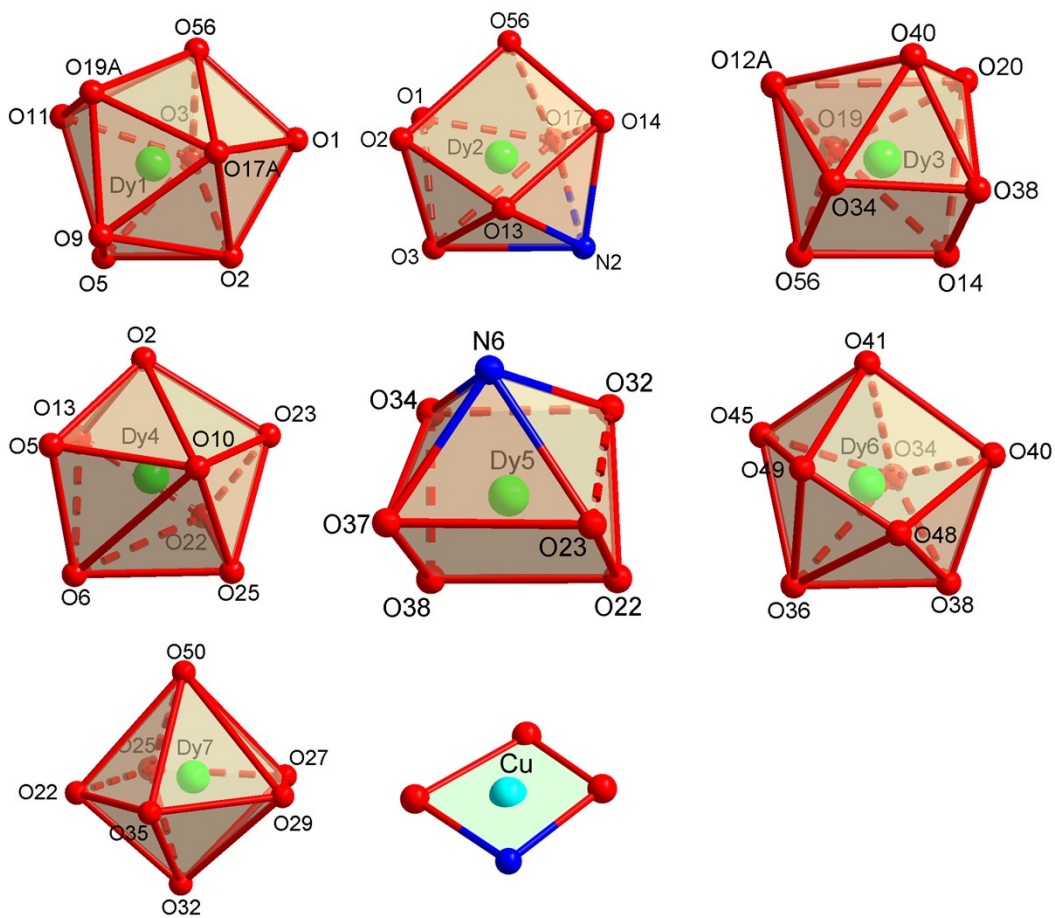

**Figure S5.** Coordination polyhedrons around the Dy(III) ions and Cu(II) of **1** with labels for selected atoms.

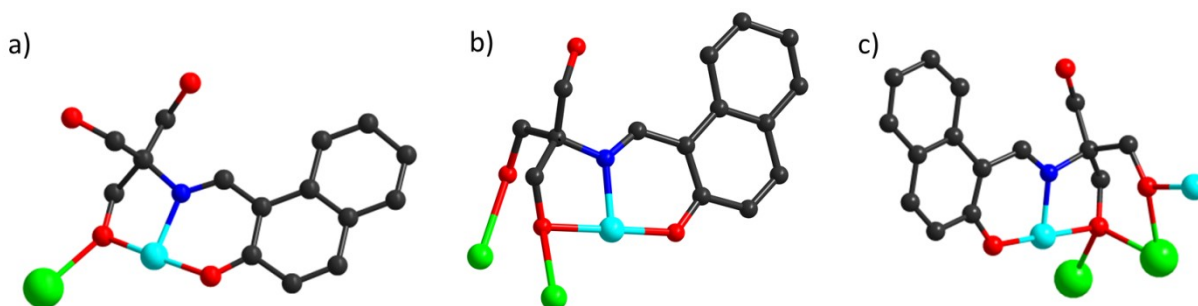

**Figure S6.** Different bridging modes of  $(H_2L)^{2-}$  (a and b) and  $(HL)^{3-}$  (c) in **1**.

## 6. Major species and fragments detected in 1

**Table S10.** Major species and fragments detected in the formation reaction for **1** through HRESI-MS.

| Symbol of intermediates                        | 1 (In-Source CID 0 eV)                                                                                                                                                            | Obs. m/z | Calc. m/z |
|------------------------------------------------|-----------------------------------------------------------------------------------------------------------------------------------------------------------------------------------|----------|-----------|
|                                                | Peaks                                                                                                                                                                             |          |           |
| Dy                                             | $[\text{Dy}(\text{NO}_3)_2]^+$                                                                                                                                                    | 287.92   | 287.90    |
| DyL'                                           | $[\text{Dy}(\text{H}_2\text{L}')(\text{NO}_3)(\text{H}_2\text{O})(\text{CH}_3\text{OH})]^+$                                                                                       | 411.88   | 412.01    |
| DyCuL                                          | $[\text{DyCu}(\text{H}_2\text{L})(\text{CH}_3\text{CN})(\text{OAc})_2]^+$                                                                                                         | 600.07   | 600.00    |
| Dy <sub>2</sub> CuL                            | $[\text{Dy}_2\text{Cu}(\text{L})(\text{OH})_2(\text{NO}_3)(\text{H}_2\text{O})_4(\text{CH}_3\text{OH})_2(\text{CH}_3\text{CH}_2\text{OH})]^+$                                     | 957.94   | 957.90    |
| DyCu <sub>2</sub> L                            | $[\text{DyCu}_2(\text{HL})(\text{OAc})(\text{OH})_2(\text{CH}_3\text{CH}_2\text{OH})(\text{CH}_3\text{OH})(\text{H}_2\text{O})]^+$                                                | 752.99   | 752.99    |
|                                                | $[\text{DyCu}_2(\text{HL})(\text{NO}_3)(\text{OH})_2(\text{CH}_3\text{CH}_2\text{OH})(\text{CH}_3\text{OH})(\text{H}_2\text{O})_2]^+$                                             | 771.94   | 771.96    |
|                                                | $[\text{DyCu}_2(\text{HL})(\text{NO}_3)(\text{OH})_2(\text{CH}_3\text{CN})(\text{CH}_3\text{OH})(\text{H}_2\text{O})_3]^+$                                                        | 785.91   | 785.97    |
| Dy <sub>2</sub> Cu <sub>2</sub> L <sub>2</sub> | $[\text{Dy}_2\text{Cu}_2(\text{L})(\text{HL})(\text{OAc})_2]^+$                                                                                                                   | 1105.06  | 1104.94   |
|                                                | $[\text{Dy}_2\text{Cu}_2(\text{L})_2(\text{OAc})_2]^+$                                                                                                                            | 1119.99  | 1119.87   |
|                                                | $[\text{Dy}_2\text{Cu}_2(\text{L})(\text{HL})(\text{OAc})(\text{NO}_3)(\text{CH}_3\text{CN})_2(\text{CH}_3\text{OH})]^+$                                                          | 1231.97  | 1231.98   |
|                                                | $[\text{Dy}_2\text{Cu}_2(\text{L})(\text{HL})(\text{OAc})(\text{NO}_3)(\text{CH}_3\text{CN})_4(\text{CH}_3\text{OH})_2(\text{H}_2\text{O})]^+$                                    | 1361.99  | 1362.06   |
|                                                | $[\text{Dy}_2\text{Cu}_2(\text{L})(\text{HL})(\text{OAc})(\text{NO}_3)(\text{CH}_3\text{CN})_3(\text{CH}_3\text{OH})_3(\text{H}_2\text{O})_3]^+$                                  | 1390.94  | 1391.09   |
| Dy <sub>2</sub> Cu <sub>3</sub> L <sub>4</sub> | $[\text{Dy}_2\text{Cu}_3(\text{H}_3\text{L})(\text{H}_2\text{L})_3(\text{OAc})_3(\text{NO}_3)_2(\text{HO})_3(\text{CH}_3\text{OH})_3]^+$                                          | 1790.93  | 1791.10   |
|                                                | $[\text{Dy}_2\text{Cu}_3(\text{H}_2\text{L})_2(\text{H}_2\text{L})_2(\text{OAc})_4(\text{NO}_3)_3(\text{HO})_2(\text{CH}_3\text{OH})_4]^+$                                        | 1802.79  | 1803.15   |
| Dy <sub>3</sub> Cu <sub>2</sub> L <sub>2</sub> | $[\text{Dy}_3\text{Cu}_2(\text{L})_2(\text{OAc})(\text{NO}_3)(\text{OH})_2(\text{CH}_3\text{CH}_2\text{OH})_2(\text{HO})]^+$                                                      | 1423.92  | 1423.93   |
|                                                | $[\text{Dy}_3\text{Cu}_2(\text{L})_2(\text{OAc})(\text{NO}_3)(\text{OH})_2(\text{CH}_3\text{CN})_3(\text{CH}_3\text{OH})(\text{CH}_3\text{CH}_2\text{OH})(\text{H}_2\text{O})]^+$ | 1454.87  | 1454.95   |
|                                                | $[\text{Dy}_3\text{Cu}_2(\text{L})(\text{HL})(\text{OAc})_5(\text{H}_2\text{O})(\text{CH}_3\text{OH})]^+$                                                                         | 1506.03  | 1505.95   |
| Dy <sub>3</sub> Cu <sub>4</sub> L <sub>4</sub> | $[\text{Dy}_3\text{Cu}_4(\text{H}_2\text{L})_4(\text{OAc})_6(\text{NO}_3)(\text{CH}_3\text{OH})_3]^+$                                                                             | 2350.83  | 2351.08   |
|                                                | $[\text{Dy}_3\text{Cu}_4(\text{H}_2\text{L})_3(\text{H}_2\text{L})(\text{OAc})_6(\text{NO}_3)(\text{CH}_3\text{OH})_3(\text{HO})]^+$                                              | 2400.94  | 2401.12   |
| Dy <sub>4</sub> Cu <sub>3</sub> L <sub>2</sub> | $[\text{Dy}_4\text{Cu}_2(\text{L})_2(\text{OAc})_4(\text{NO}_3)_2(\text{HO})_4(\text{CH}_3\text{CN})]^+$                                                                          | 1802.70  | 1802.86   |
| Dy <sub>4</sub> Cu <sub>3</sub> L <sub>3</sub> | $[\text{Dy}_4\text{Cu}_3(\text{L})_3(\text{OAc})_4(\text{NO}_3)(\text{HO})_2(\text{CH}_3\text{OH})(\text{CH}_3\text{CN})]^+$                                                      | 2064.93  | 2064.89   |
|                                                | $[\text{Dy}_4\text{Cu}_3(\text{L})_3(\text{OAc})_5(\text{HO})_2(\text{CH}_3\text{OH})_2(\text{CH}_3\text{CN})]^+$                                                                 | 2076.80  | 2076.94   |
| Dy <sub>5</sub> Cu <sub>4</sub> L <sub>4</sub> | $[\text{Dy}_5\text{Cu}_4(\text{L})_4(\text{OAc})_6(\text{NO}_3)(\text{HO})(\text{CH}_3\text{OH})]^+$                                                                              | 2623.86  | 2623.85   |

**Table S11.** The change of the relative HRESI-MS (positive mode) peak intensities for the intermediate species with the reaction time in the formation reaction of **1**.

| Reaction time | The relative HRESI-MS peak intensities for the intermediate species |      |       |                     |                     |                                                |                                                |                                                |                                                |                                                |                                                |                                                |
|---------------|---------------------------------------------------------------------|------|-------|---------------------|---------------------|------------------------------------------------|------------------------------------------------|------------------------------------------------|------------------------------------------------|------------------------------------------------|------------------------------------------------|------------------------------------------------|
|               | Dy                                                                  | DyL' | DyCuL | Dy <sub>2</sub> CuL | DyCu <sub>2</sub> L | Dy <sub>2</sub> Cu <sub>2</sub> L <sub>2</sub> | Dy <sub>3</sub> Cu <sub>2</sub> L <sub>2</sub> | Dy <sub>2</sub> Cu <sub>3</sub> L <sub>4</sub> | Dy <sub>4</sub> Cu <sub>2</sub> L <sub>2</sub> | Dy <sub>4</sub> Cu <sub>3</sub> L <sub>3</sub> | Dy <sub>3</sub> Cu <sub>4</sub> L <sub>4</sub> | Dy <sub>5</sub> Cu <sub>4</sub> L <sub>4</sub> |
| 1 min         | 0.10                                                                | 0.10 | 0.01  | 0.01                | 0.2                 | 0.01                                           | 0.01                                           | 0                                              | 0                                              | 0                                              | 0                                              | 0                                              |
| 5 min         | 0.20                                                                | 0.10 | 0.012 | 0.01                | 0.15                | 0.01                                           | 0.01                                           | 0                                              | 0                                              | 0                                              | 0                                              | 0                                              |
| 15 min        | 0.47                                                                | 0.32 | 0.013 | 0.015               | 0.1                 | 0.02                                           | 0.02                                           | 0                                              | 0                                              | 0                                              | 0                                              | 0                                              |
| 25 min        | 0.67                                                                | 0.48 | 0.8   | 0.1                 | 0.01                | 0.01                                           | 0.01                                           | 0                                              | 0                                              | 0                                              | 0                                              | 0                                              |
| 45 min        | 0.75                                                                | 0.64 | 0.9   | 0.2                 | 0.2                 | 0.01                                           | 0.01                                           | 0                                              | 0                                              | 0                                              | 0                                              | 0                                              |
| 60 min        | 0.59                                                                | 0.53 | 0.3   | 0.28                | 0.09                | 0.01                                           | 0.01                                           | 0                                              | 0                                              | 0                                              | 0                                              | 0                                              |
| 90 min        | 0.44                                                                | 0.49 | 0.4   | 0.36                | 0.48                | 0.02                                           | 0.20                                           | 0.01                                           | 0.01                                           | 0.01                                           | 0                                              | 0                                              |
| 120 min       | 0.42                                                                | 0.38 | 0.3   | 0.23                | 0.65                | 0.03                                           | 0.25                                           | 0.01                                           | 0.01                                           | 0.02                                           | 0                                              | 0                                              |
| 180 min       | 0.34                                                                | 0.51 | 0.2   | 0.15                | 0.66                | 0.19                                           | 0.18                                           | 0.04                                           | 0.05                                           | 0.01                                           | 0.01                                           | 0                                              |
| 240 min       | 0.34                                                                | 0.38 | 0.18  | 0.07                | 0.87                | 0.19                                           | 0.40                                           | 0.06                                           | 0.07                                           | 0.07                                           | 0.01                                           | 0                                              |
| 360 min       | 0.41                                                                | 0.50 | 0.15  | 0.07                | 0.20                | 0.64                                           | 0.65                                           | 0.15                                           | 0.14                                           | 0.11                                           | 0.06                                           | 0                                              |
| 450 min       | 0.23                                                                | 0.36 | 0.01  | 0.08                | 0.10                | 0.62                                           | 0.80                                           | 0.20                                           | 0.23                                           | 0.32                                           | 0.1                                            | 0                                              |
| 600 min       | 0.33                                                                | 0.14 | 0.01  | 0.11                | 0.10                | 0.51                                           | 0.30                                           | 0.43                                           | 0.29                                           | 0.39                                           | 0.13                                           | 0.11                                           |
| 810 min       | 0.20                                                                | 0.04 | 0.02  | 0.02                | 0.02                | 0.11                                           | 0.40                                           | 0.35                                           | 0.28                                           | 0.45                                           | 0.12                                           | 0.34                                           |
| 1080 min      | 0.04                                                                | 0.01 | 0.01  | 0.043               | 0.06                | 0.30                                           | 0.3                                            | 0.17                                           | 0.24                                           | 0.29                                           | 0.15                                           | 0.34                                           |
| 1440 min      | 0.10                                                                | 0.01 | 0.015 | 0.01                | 0.01                | 0.23                                           | 0.25                                           | 0.15                                           | 0.22                                           | 0.11                                           | 0.11                                           | 0.21                                           |



7. The superposed simulated and observed spectra of several species figure of 1

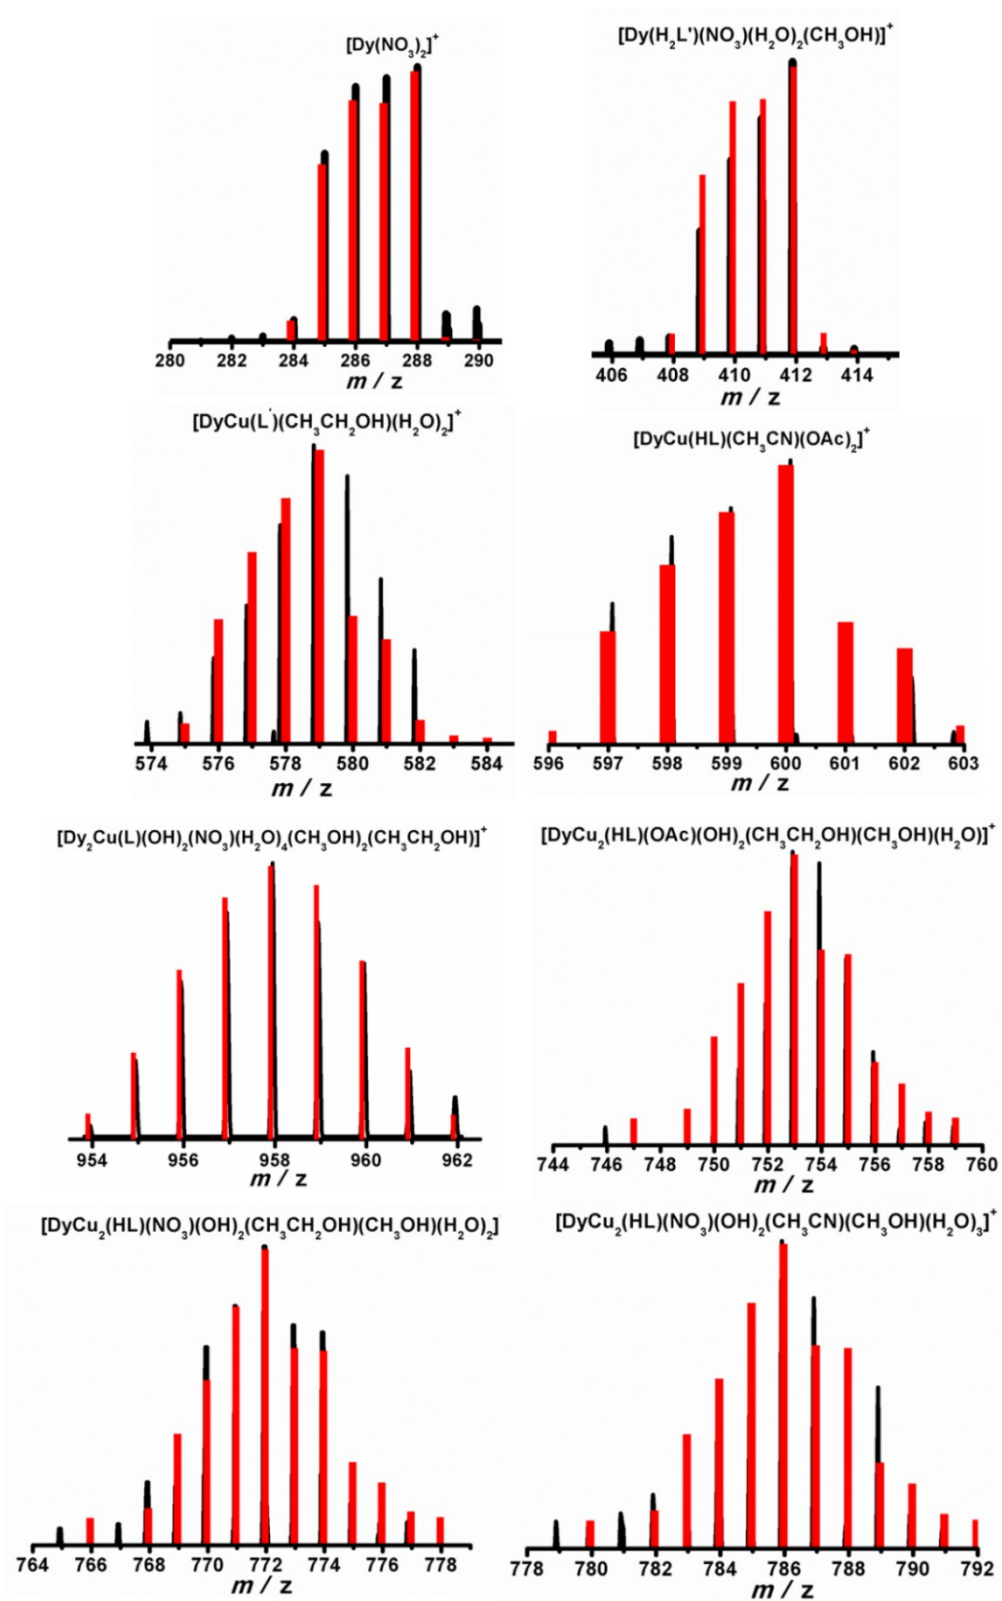

**Figure S7.** The superposed simulated (red) and observed (black) spectra of several species in the Time-dependent ESI-MS of 1.

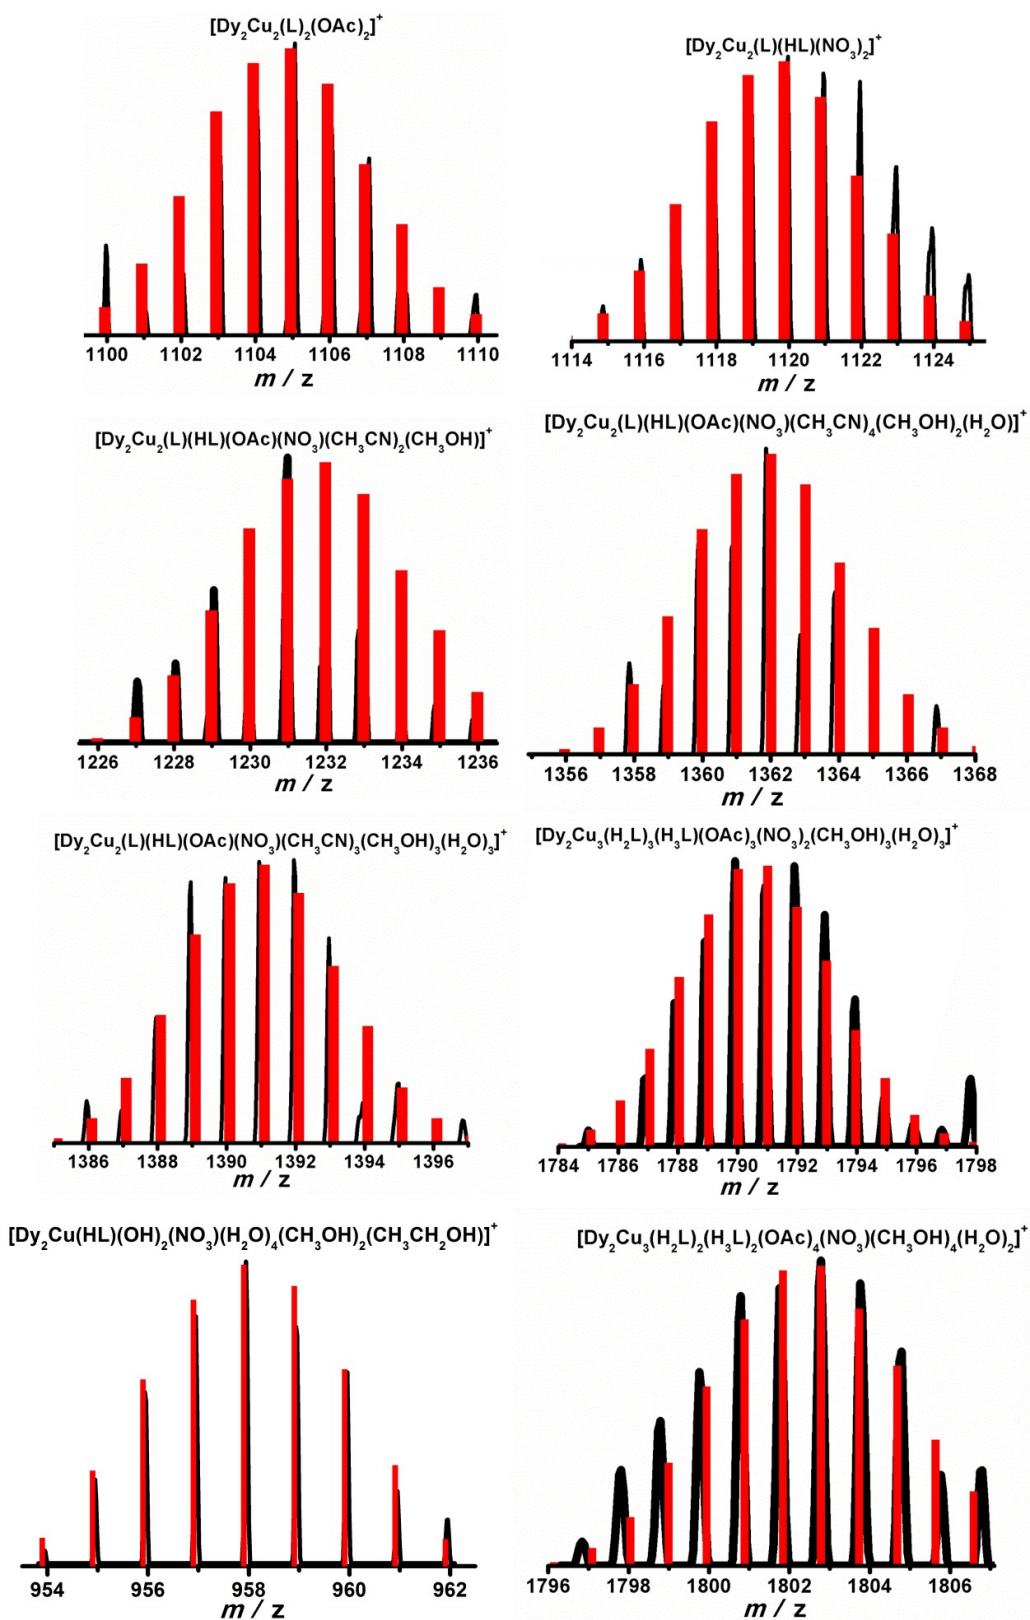

**Figure S8.** The superposed simulated (red) and observed (black) spectra of several species in the Time-dependent ESI-MS of **1**.

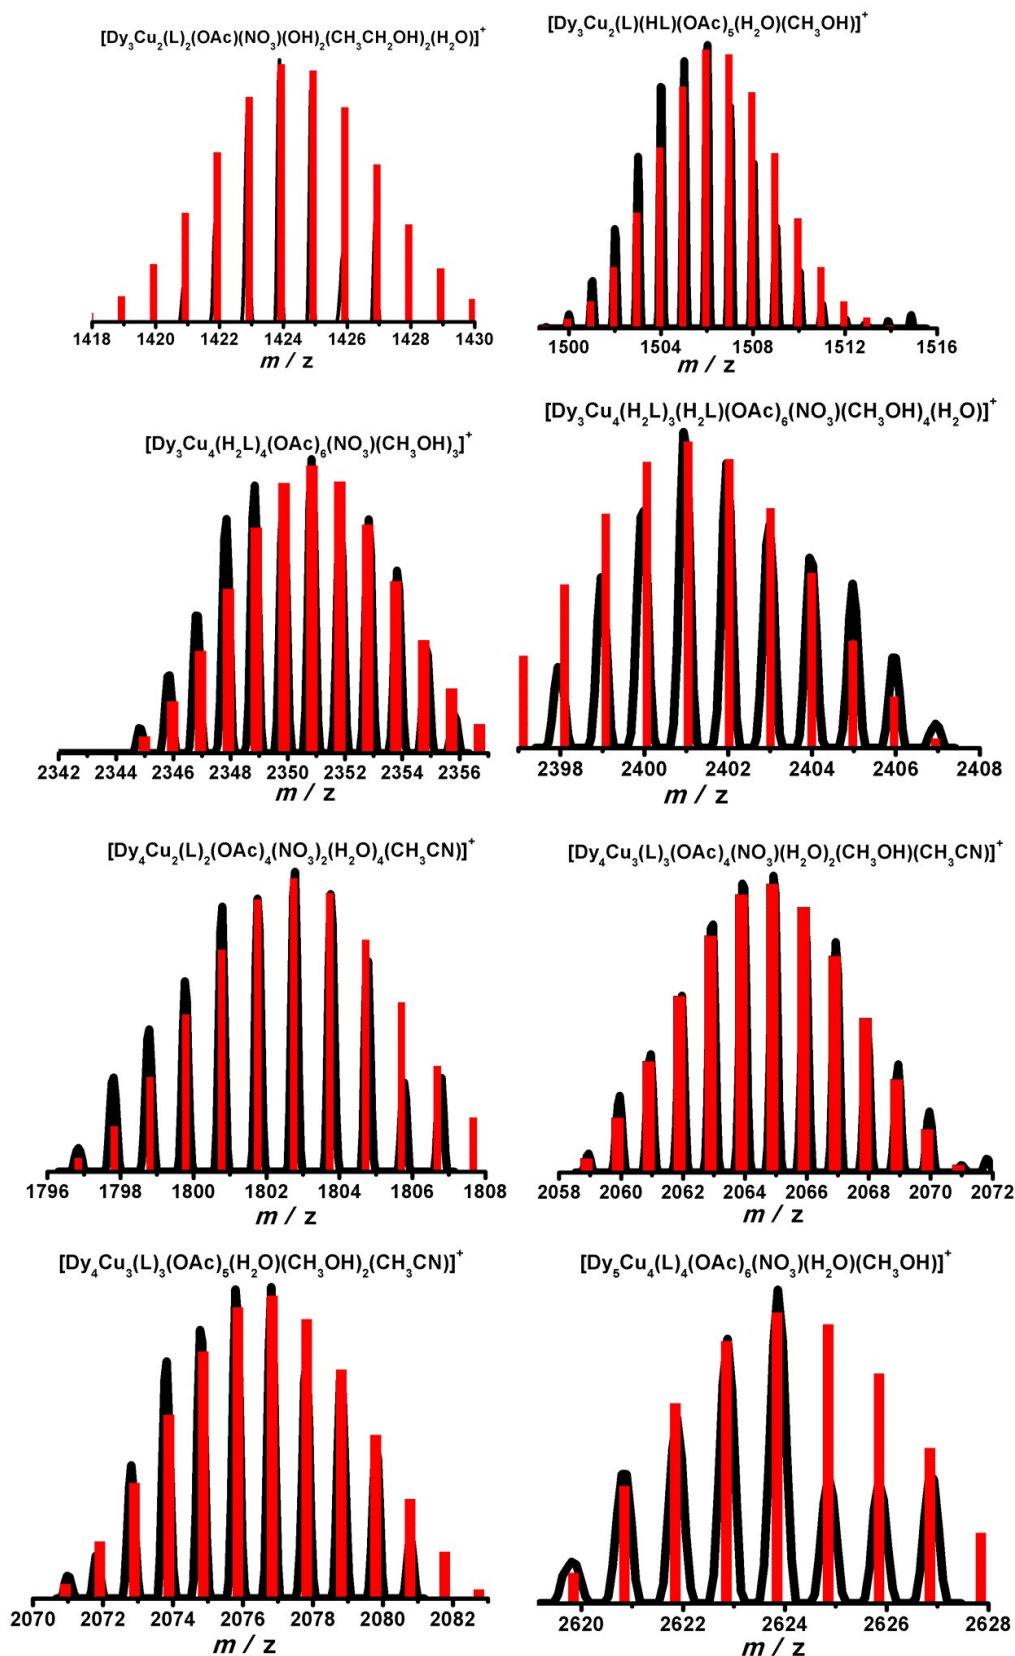

**Figure S9.** The superposed simulated (red) and observed (black) spectra of several species in the Time-dependent ESI-MS of **1**.

## 8. Additional figures for static magnetic properties of **1**

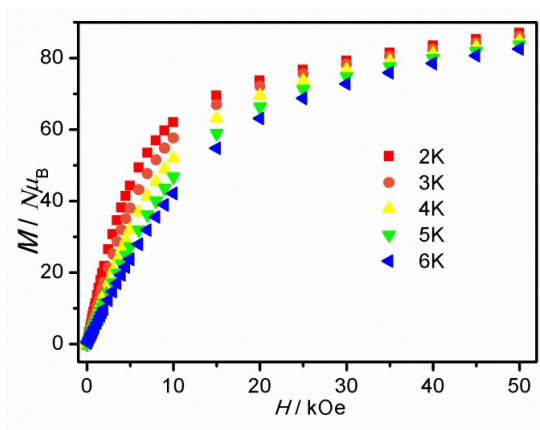

**Figure S10.** Plots of  $M$  vs.  $H$  for **1** measured at 2, 3, 4, 5 and 6 K.

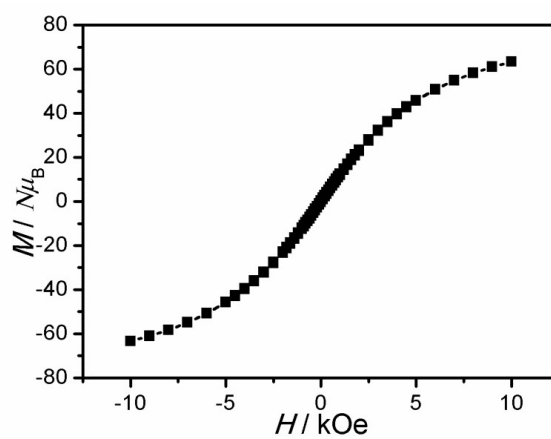

**Figure S11.** Plots of Magnetic hysteresis loops for **1**.

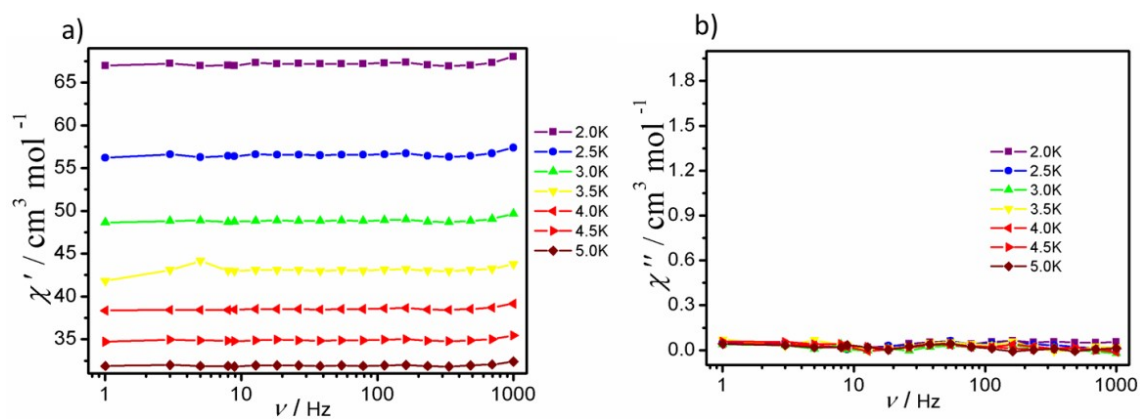

**Figure S12.** Plots of  $\chi'$  vs  $\nu$  (a) and  $\chi''$  vs  $\nu$  (a) at 2.0 -5.0 K under a dc field of 0 Oe for **1**.

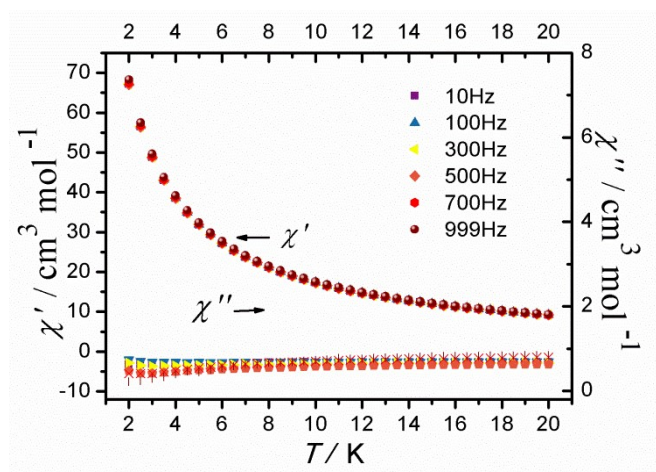

**Figure S13** Temperature-dependent  $\chi'$  and  $\chi''$  ac susceptibilities under zero dc field for **1**.

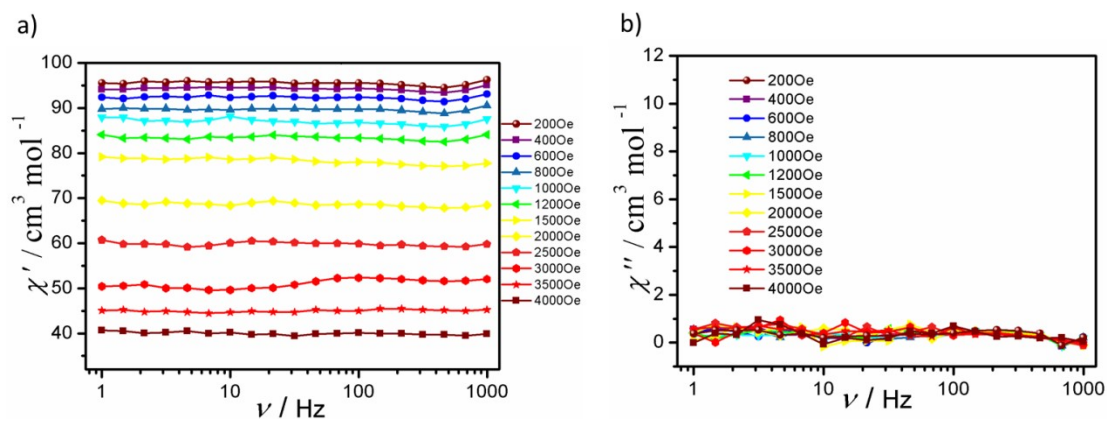

**Figure S14.** Plots of  $\chi'$  and  $\chi''$  vs  $\nu$  at 2 K under different dc field for **1**.
